# Supplementary material for: RNA editing by ADAR1 regulates innate and antiviral immune functions in primary macrophages
Source: PubMed Central journal article supplement (PMC5645456; doi:10.1038/s41598-017-13580-0), 2017-10-17

## **Supplementary information**

### **RNA editing by ADAR1 regulates innate and antiviral immune functions in primary macrophages**

Maria Pujantell<sup>1</sup>, Eva Riveira-Muñoz<sup>1</sup>, Roger Badia<sup>1</sup>, Marc Castellví<sup>1</sup>, Edurne Garcia-  
Vidal<sup>1</sup>, Guillem Sirera<sup>2</sup>, Teresa Puig<sup>1</sup>, Cristina Ramirez<sup>1</sup>, Bonaventura Clotet<sup>1</sup>, José

A. Esté<sup>1,\*</sup> and Ester Ballana<sup>1,\*</sup>

## Supplementary Figure Legends

### Supplementary Figure 1. ADAR1 knockdown boosts type I IFN response and blocks

#### HIV-1 replication in primary macrophages. (A) Effective downregulation of *ADAR1* by

two different siRNA in primary macrophages. Relative mRNA expression of *ADAR1* was measured by quantitative PCR and normalized to GAPDH expression. Data represents mean  $\pm$  SD of 3 different donors and is normalized to Mock-transfected macrophages.

#### (B) Relative mRNA expression of *IFIH1*, *IFNB1* and *CXCL10* in ADAR1 knockdown

macrophages by two different siRNA. mRNA expression was measured by quantitative PCR and normalized to GAPDH expression. Data represents mean  $\pm$  SD of 3 different donors and is normalized to Mock-transfected macrophages. Protein expression in

#### ADAR1 and IFIH1 knockdown macrophages. (C) HIV-1 replication in ADAR1 knockdown

M-CSF macrophages, infected with a VSV-pseudotyped, GFP-expressing HIV-1. Data represent percentage replication relative to mock-transfected macrophages. Mean  $\pm$  SD of 3 different donors performed in triplicate is shown.

#### (D) Western blot showing ADAR1 downregulation by two independent siRNA and innate immune activation following

ADAR1 knockdown. GAPDH was used as loading control. A representative donor is shown. The figure shows the cropped gels/blots obtained by each protein evaluation.

Full-length blots of each tested protein are included in supplementary material. \*

p<0.05; \*\* p<0.005; \*\*\* p<0.0005.

### Supplementary Figure 2. ADAR1 efficiently edits host *NEIL1* transcript, but does not

#### edit HIV-1 *TAR* transcript. (A) Representative DNA sequencing chromatogram of RT-PCR

products of 5' UTR HIV-1 mRNA transcript and the estimated percentage of editing

efficiency at positions TAR520/521, TAR551/552 and TAR590. (B-C) Representative DNA

sequencing chromatograms of *NEIL1* transcripts in M-CSF (B) and GM-CSF (C) MDMs of siNT and siADAR1, and relative ADAR1 editing efficiency at edited site. 5' UTR HIV-1 could not be amplified in siADAR1 sample due to restricted infection. Edited Adenosines to Inosine are detected as G by direct sequencing. \* $p < 0.05$ ; \*\* $p < 0.0005$ .

**Supplementary Figure 3. PKR knockdown by siRNA does not affect HIV-1 replication or**

**innate immune function (A)** Relative PKR mRNA (left panel) and protein (right panel)

expression is enhanced in ADAR1 knockdown macrophages. mRNA expression data represents mean  $\pm$  SD of 3 different donors and is normalized to Mock-transfected macrophages. \*  $p < 0.05$ . Western blot shows data from a representative donor. **(B)**

Effective downregulation of PKR by siRNA does not effect mRNA expression of innate immune receptors or effectors. mRNA expression of *PKR*, *ADAR1*, *IFNB1*, *IFIH1*, *DDX58*, *IRF3* and *IRF7* was measured by qPCR and expression is normalized to mock-transfected macrophages. Data represents mean  $\pm$  SD of 3 different donors. **(C)** Western blot

showing PKR downregulation and innate immune proteins in PKR knockdown macrophages. GAPDH was used as loading control. A representative donor is shown. **(D)**

HIV-1 replication in PKR knockdown M-CSF macrophages, infected with a VSV-pseudotyped, GFP-expressing HIV-1. Data represent percentage replication relative to mock-transfected macrophages. Mean  $\pm$  SD of 3 different donors performed in triplicate

is shown. The figure shows the cropped gels/blots obtained by each protein evaluation.

Full-length blots of each tested protein are included in supplementary material.

**Supplementary Figure 4. ADAR1 knockdown macrophages maintain signatures of**

**innate immune activation after long-term infection. (A)** Relative mRNA expression of

$IFN\beta$  in siRNA-treated macrophages 7 days post infection with HIV-1 BaL. *IFNB1* gene

expression was still significantly enhanced in ADAR1 knockdown macrophages. Data represents mean  $\pm$  SD of 3 different donors and is normalized to Mock-transfected M-CSF macrophages. **(B)** CXCL10 mRNA (left panel) and protein expression in the supernatant (right panel) in siRNA-treated macrophages 7 days post infection with HIV-1 BaL. Relative mRNA expression of *CXCL10* was measured by quantitative PCR and normalized to GAPDH expression. CXCL10 protein in the culture supernatants was measured by ELISA. Data represents mean  $\pm$  SD of 3 different donors. \*  $p < 0.0484$ ; \*\*  $p < 0.0098$ . **(C)** Protein expression in ADAR1 knockdown macrophages 7 days post infection with HIV-1 BaL. Western blot of ADAR1, phosphorylation of STAT1 (pSTAT1) and HIV-GAG in siRNA-treated infected macrophages. pSTAT1 is increased in ADAR1 knockdown macrophages compared to mock or non-targeting siRNA (NT). GAPDH was used as loading control. A representative donor is shown. The figure shows the cropped gels/blots obtained by each protein evaluation. Full-length blots of each tested protein are included in supplementary material.

**Supplementary Figure 5. ADAR1-mediated regulation of innate immune activation and HIV-1 infection is specific of macrophages. (A)** Relative mRNA expression of *IFIH1*, *IFNB1*, *CXCL10*, *IRF3* and *IRF7* in ADAR1 knockdown GM-CSF macrophages. mRNA expression was measured by quantitative PCR and normalized to GAPDH expression. Data represents mean  $\pm$  SD of 3 different donors and is normalized to Mock-transfected macrophages. **(B)** Relative mRNA expression of *IFIH1*, *IFNB1* and *CXCL10* in ADAR1 knockdown dendritic cells. mRNA expression was measured by quantitative PCR and normalized to GAPDH expression. Data represents mean  $\pm$  SD of 3 different donors and is normalized to Mock-transfected macrophages. \*  $p < 0.05$ ; \*\*  $p < 0.005$ .

**Supplementary Figure 6. (A) ADAR1 knockdown macrophages induce overexpression of MDA5, RIG-I, pSTAT1 and IRF7.** Quantification of Western blot bands showing the effect of ADAR1 knockdown in MDA5, RIG-I, pSTAT1, IRF7 and IRF3 expression relative to mock-transfected macrophages, corresponding to Fig 4B (left panel) and 4C (right panel). **(B) Blockade of TBK1 function restores protein expression phenotype observed in ADAR1 expressing macrophages.** Protein expression in ADAR knockdown macrophages treated with growing concentrations of the TBK1 inhibitor MRT67307 (5  $\mu$ M, 1  $\mu$ M, 0.2  $\mu$ M and 0.04  $\mu$ M). A representative donor is shown. ND, no drug. The figure shows the cropped gels/blots obtained by each protein evaluation. Full-length blots of each tested protein are included in supplementary material.

**Supplementary Figure 7. ADAR1-mediated inhibition of HIV-1 replication is not affected by secreted IFN $\beta$ .** Percentage HIV-1 infection in ADAR1 knockdown macrophages, untreated (black bars) or treated with different concentrations of anti-IFN $\beta$ 1 (grey bars) or an isotype control (white bars). No change in HIV-1 susceptibility was observed in ADAR1, in mock-transfected macrophages or macrophages transfected with a non-targeting siRNA. Data represents mean  $\pm$  SD of 3 different donors performed in triplicate.

# Supplementary Figure 1

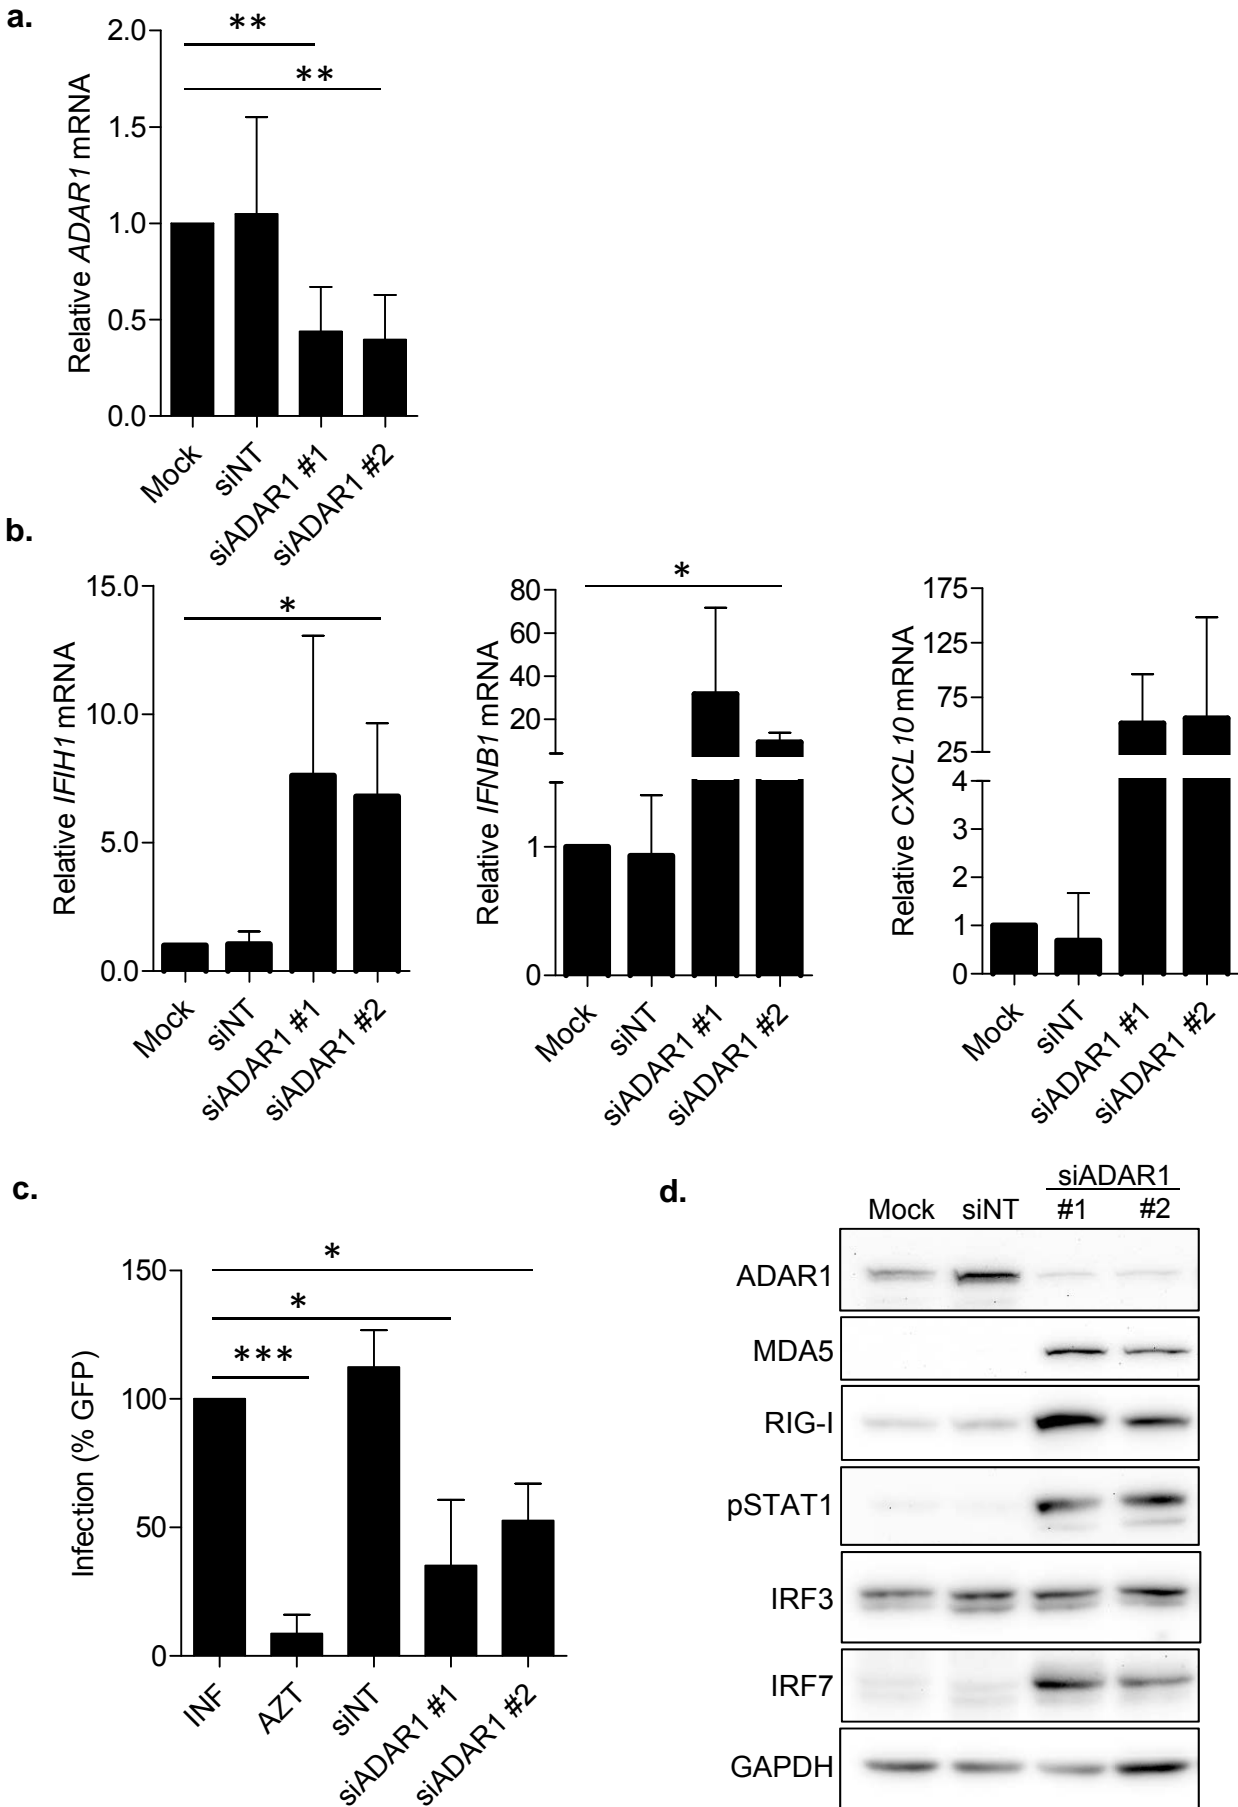

## Supplementary Figure 2

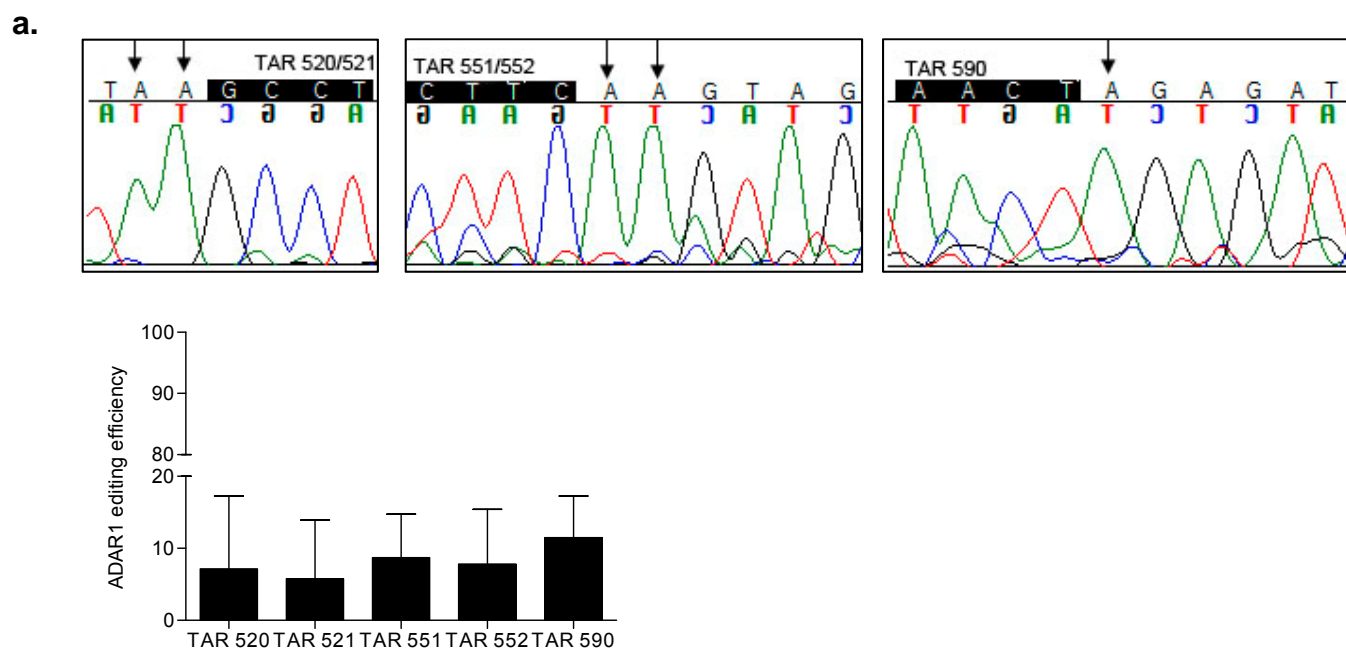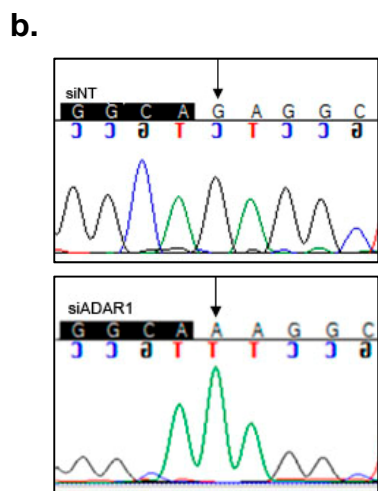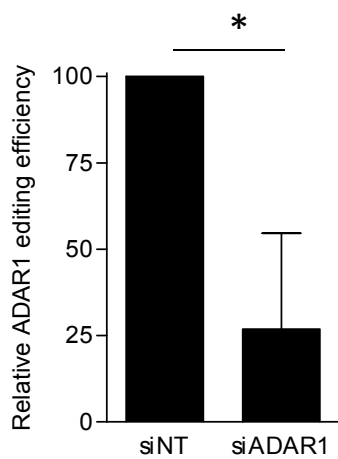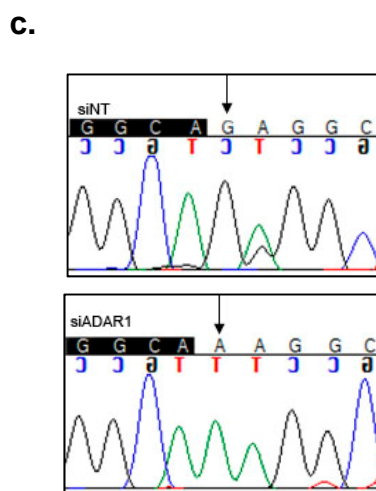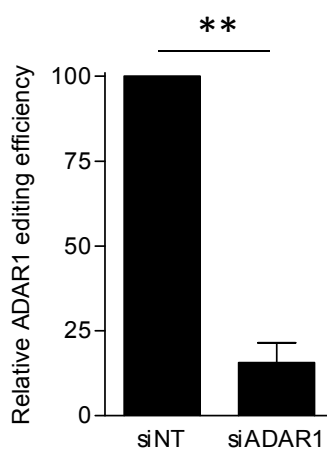

### Supplementary Figure 3

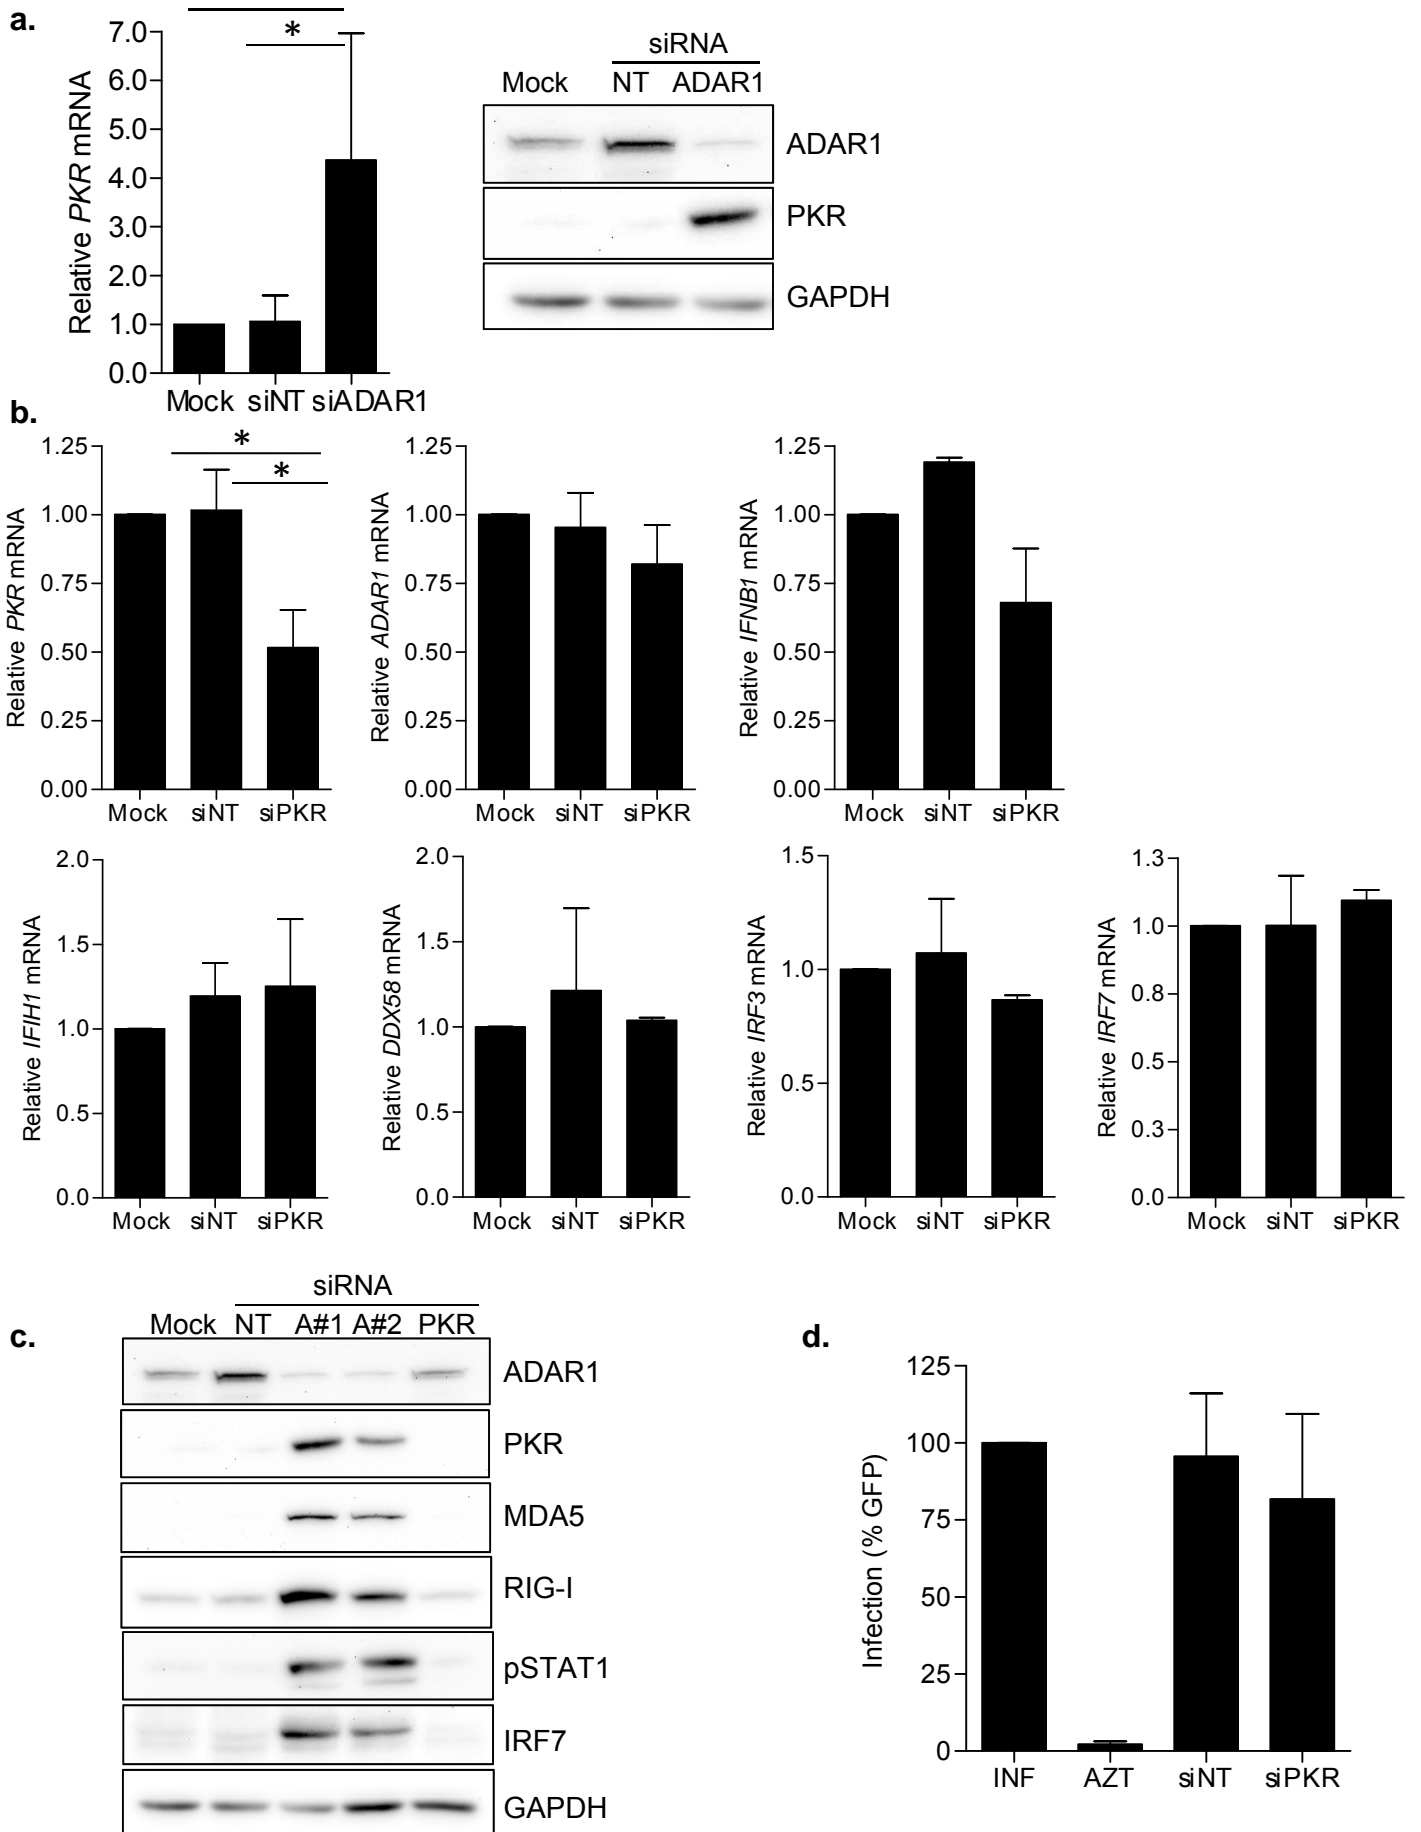





## Supplementary Figure 5

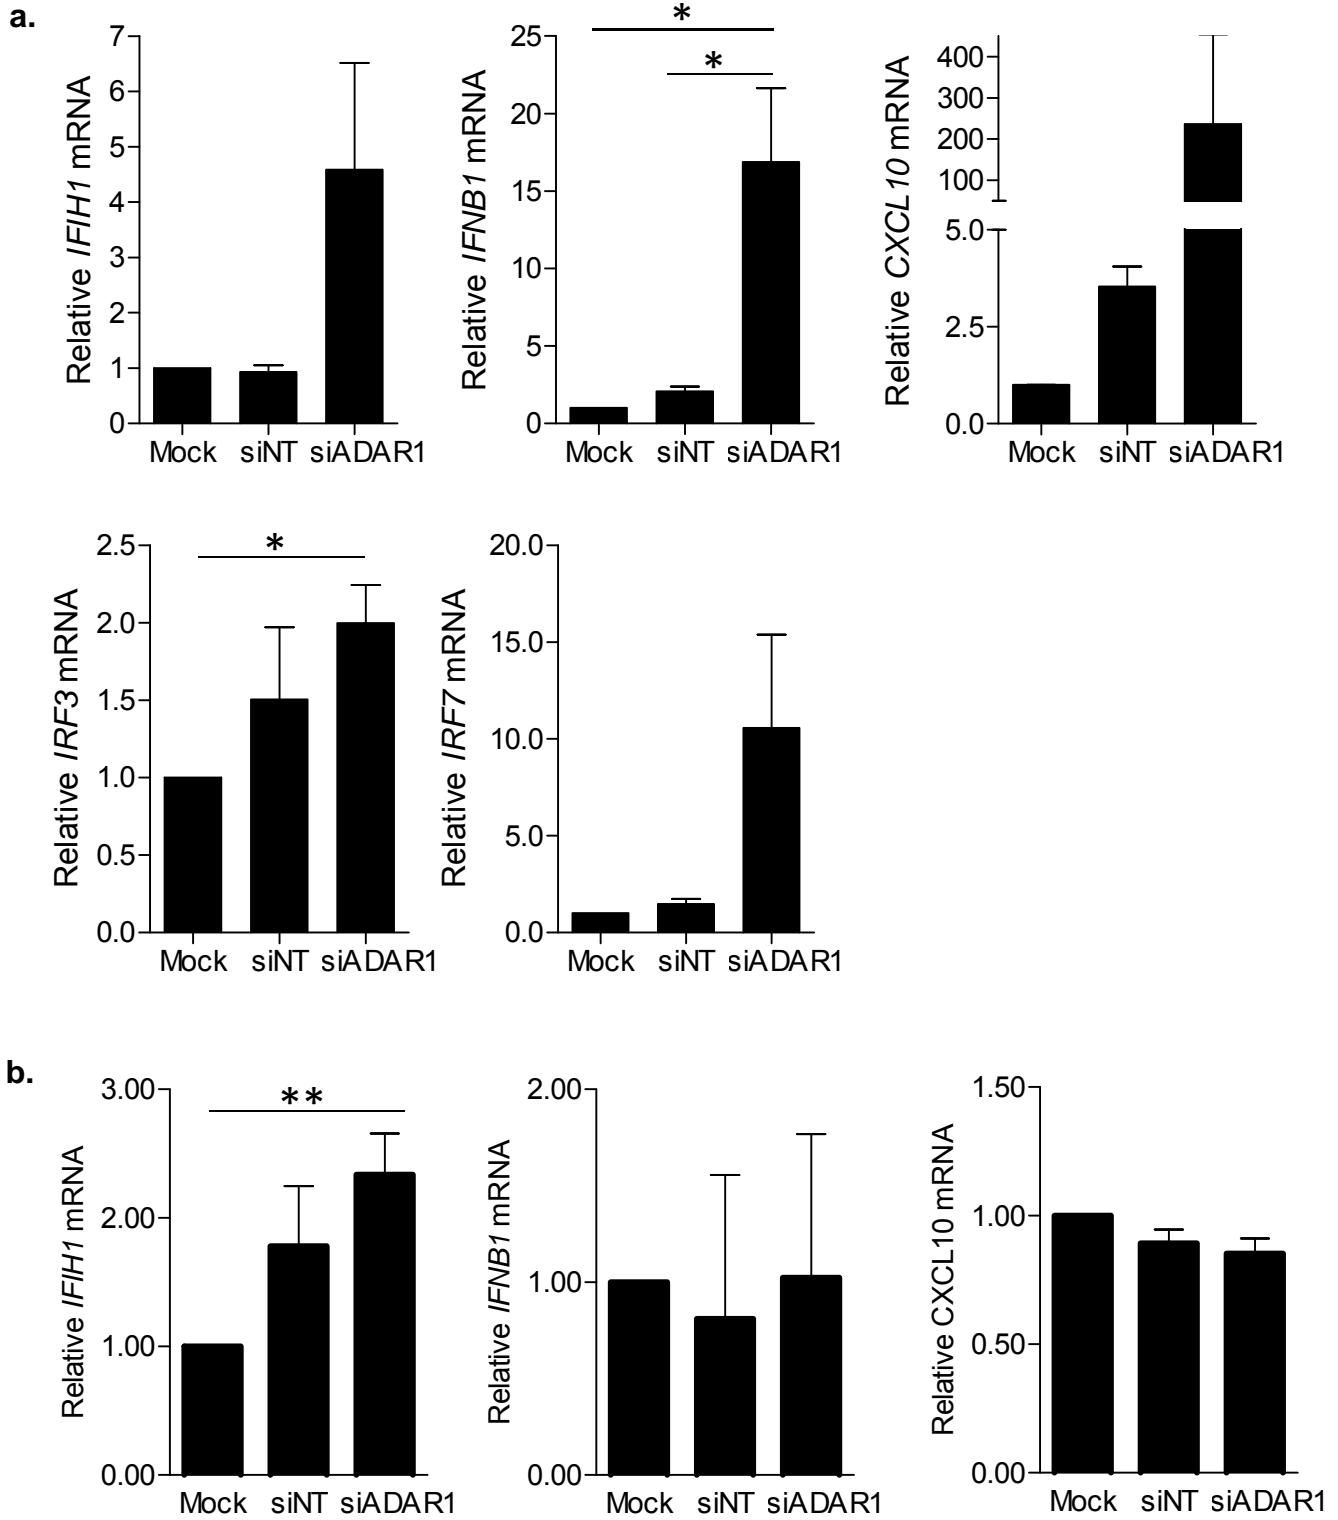



# Supplementary Figure 7

a.

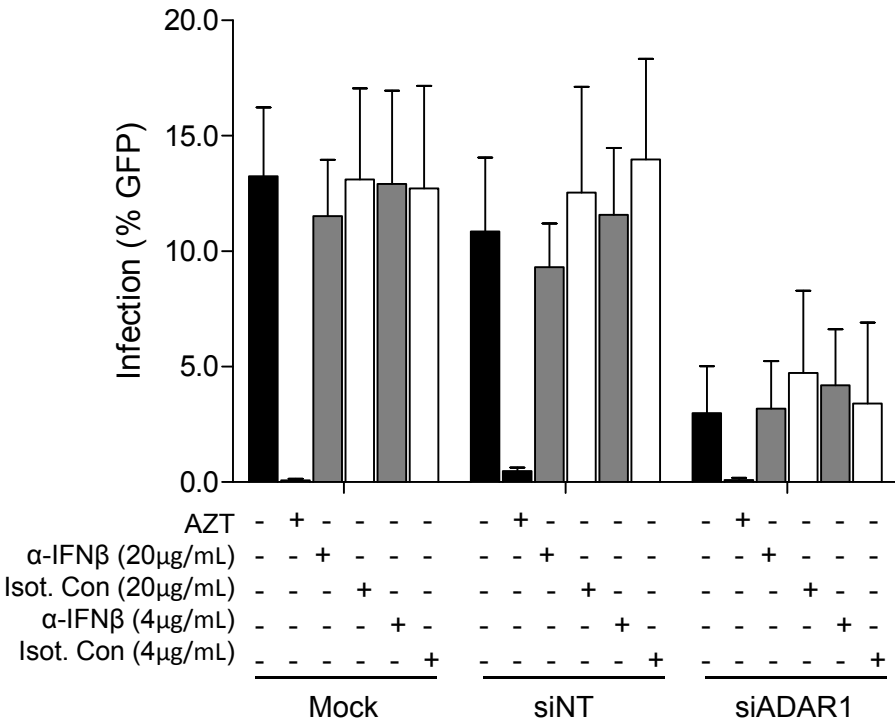

# Supplementary Western Blot Images

Full-length Western blot to Fig 1B

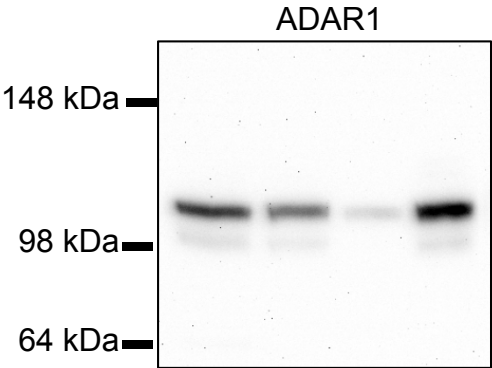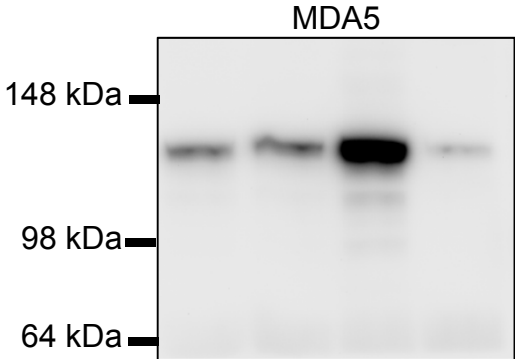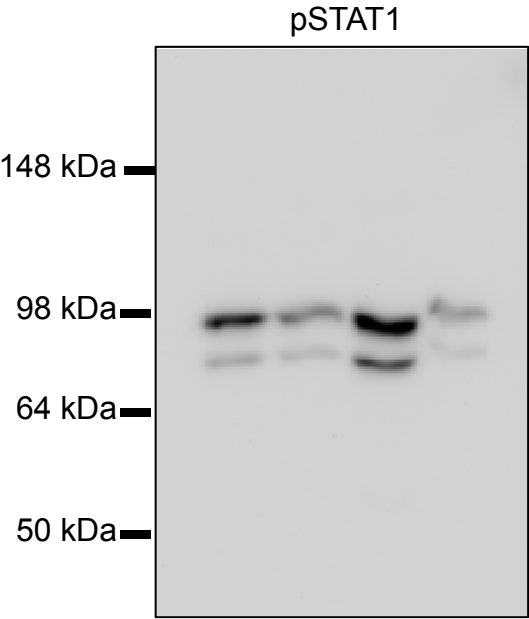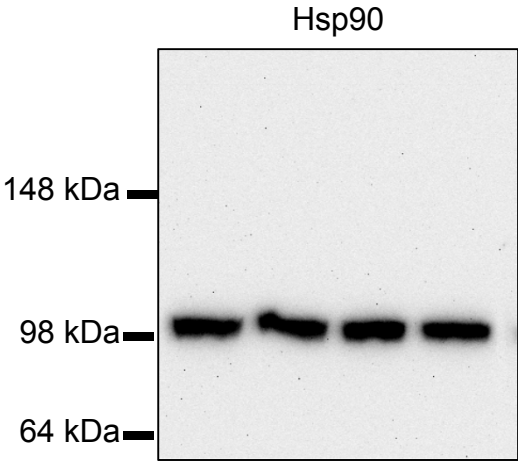

Full-length Western blot to Fig 3A

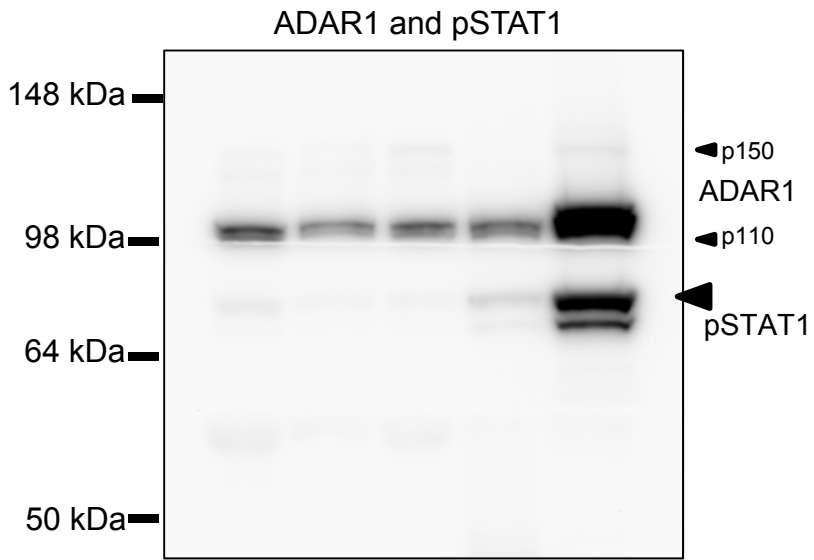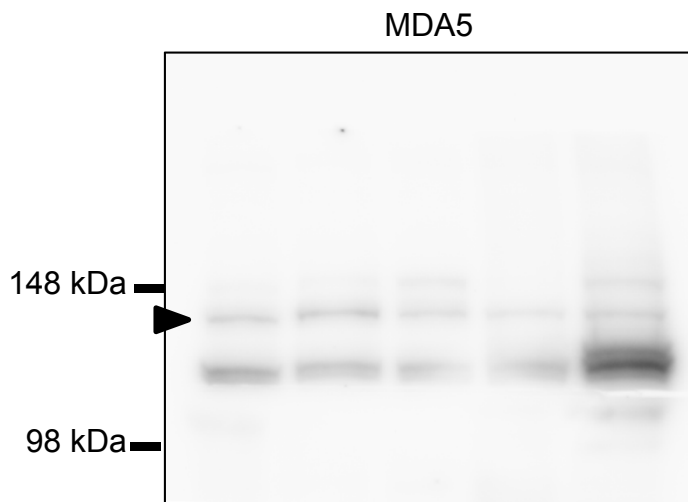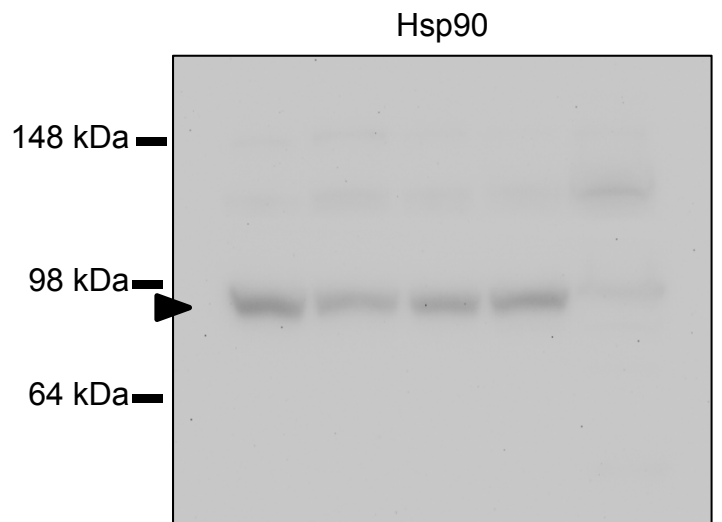

Full-length Western blot to Fig 3B

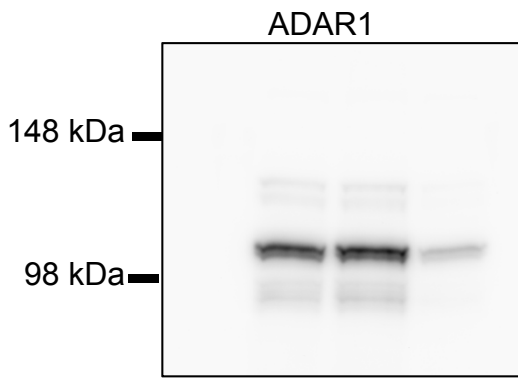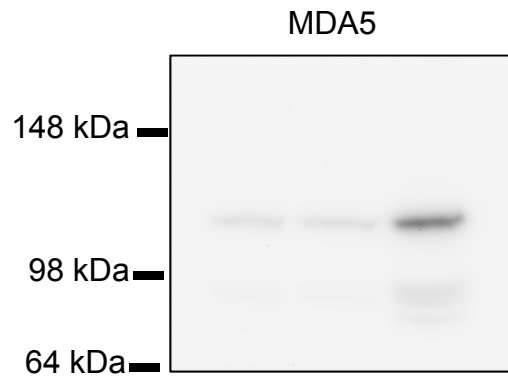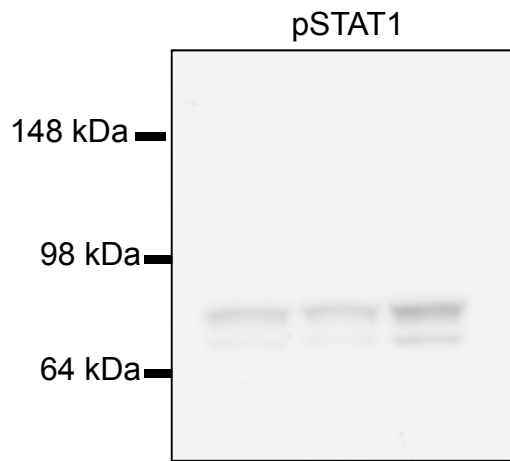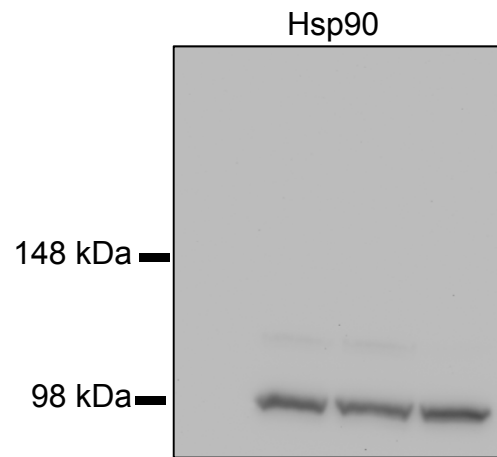

Full-length Western blot to Fig 3C

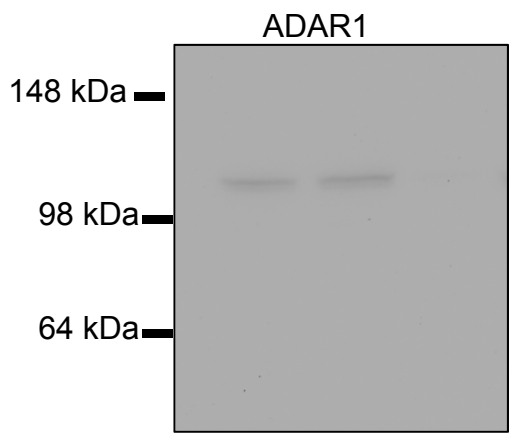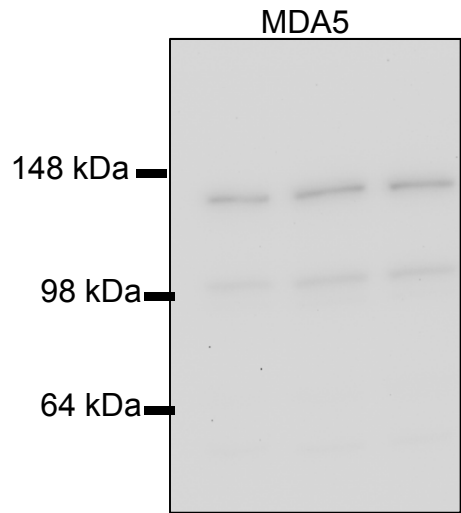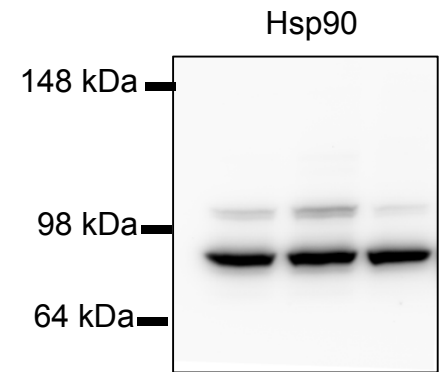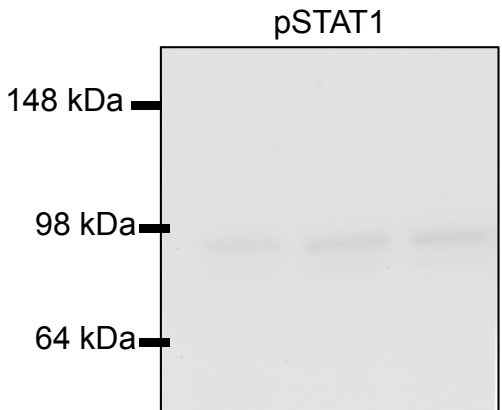

Full-length Western blot to Fig 3D

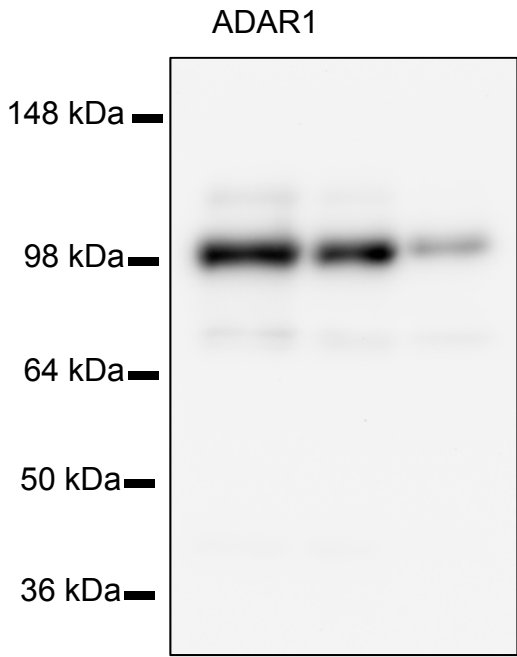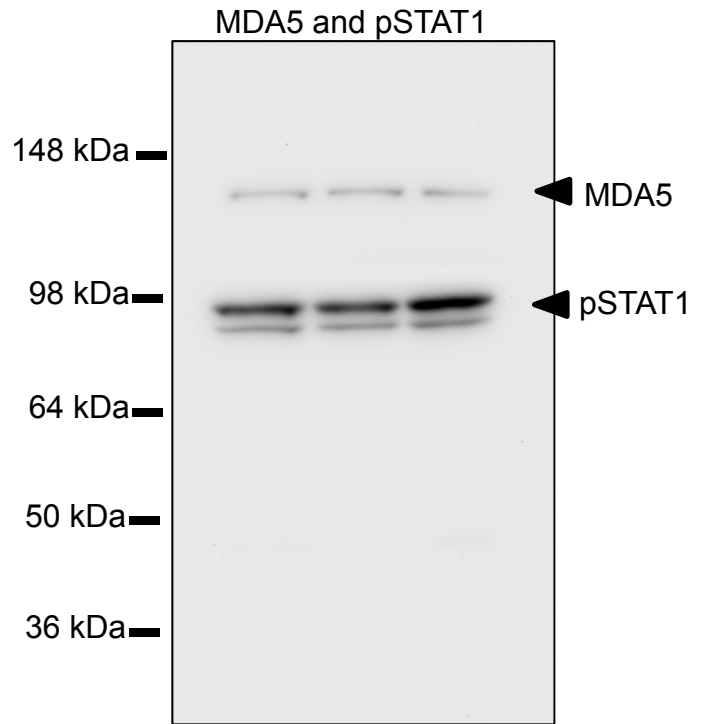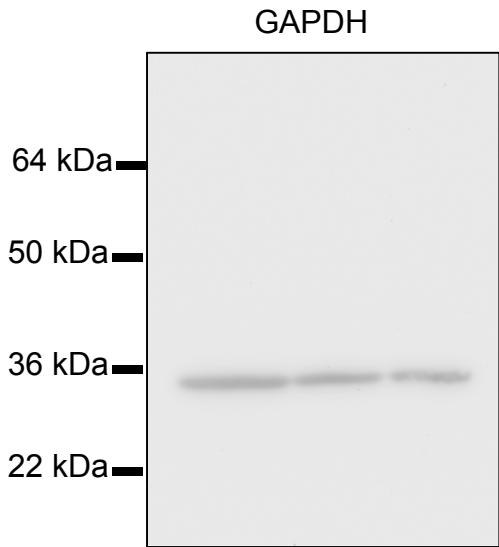



Full-length Western blot to Fig 4B

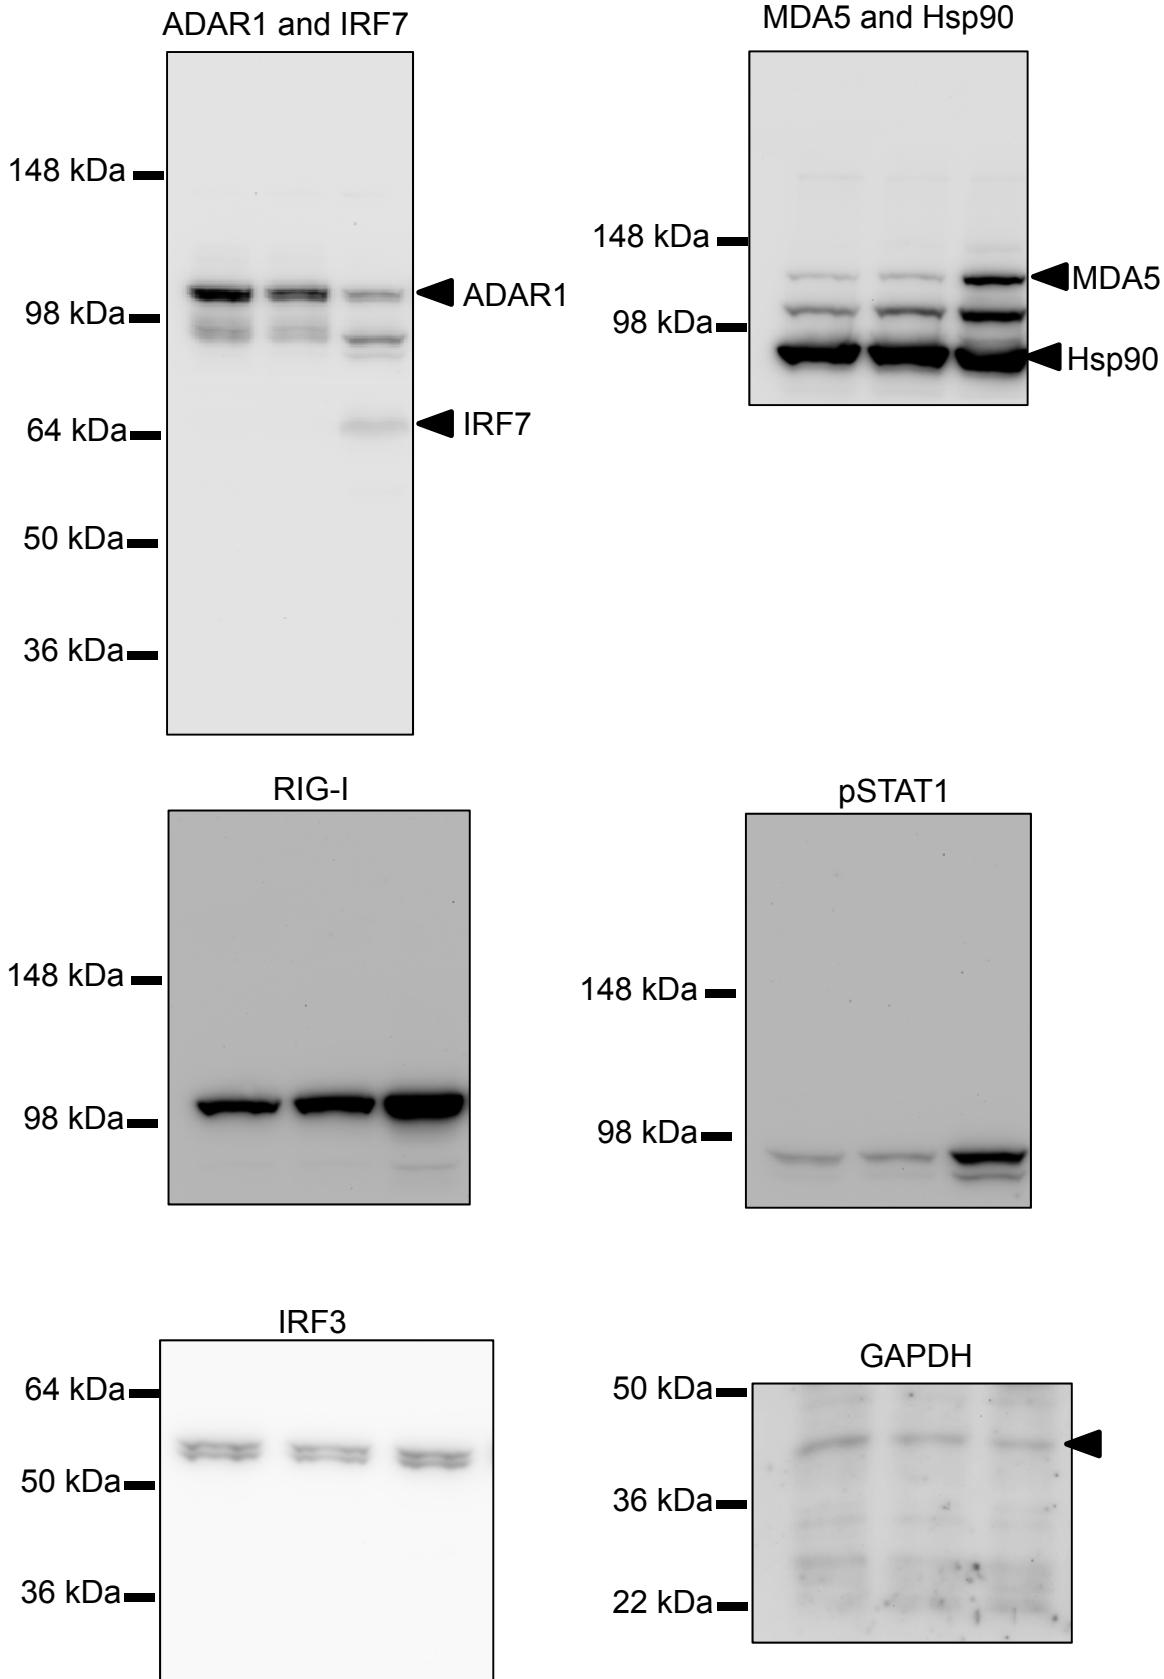

Full-length Western blot to Fig 4C

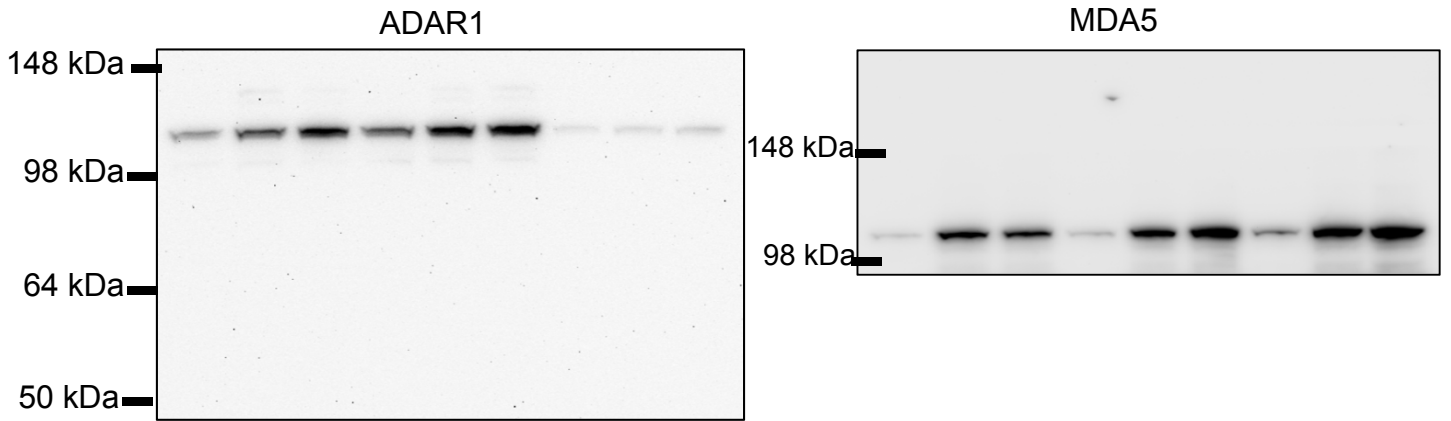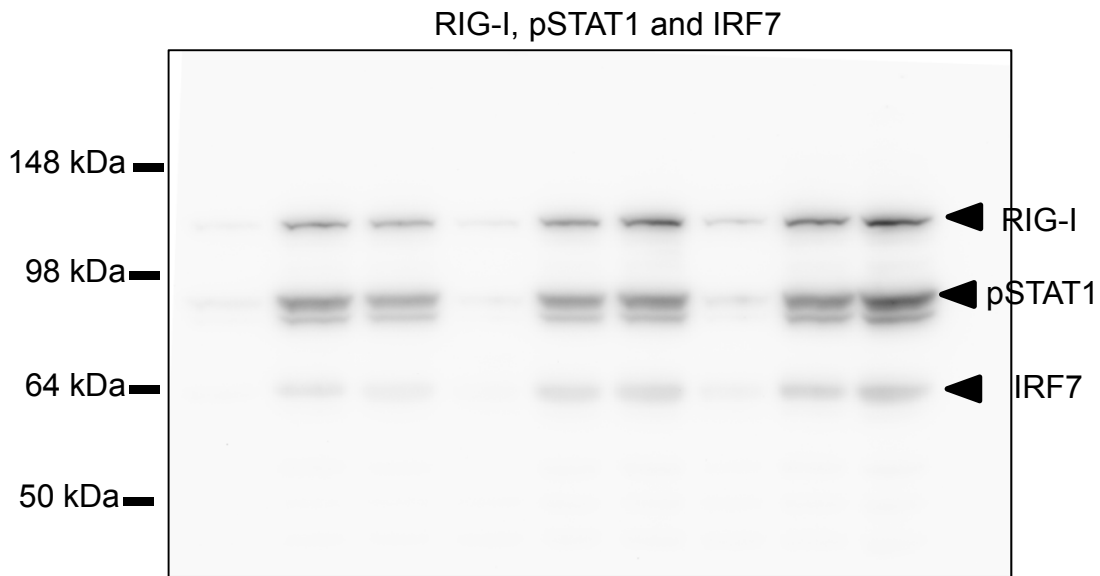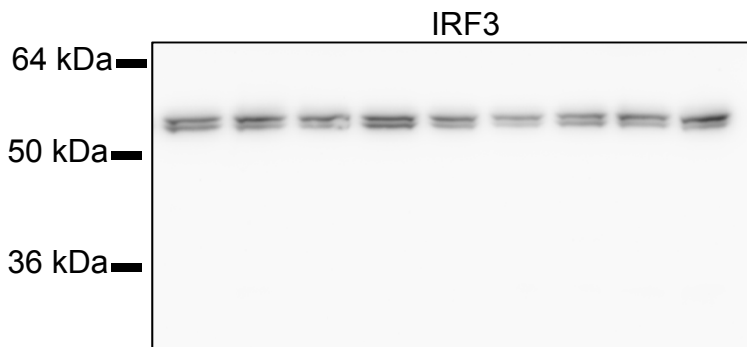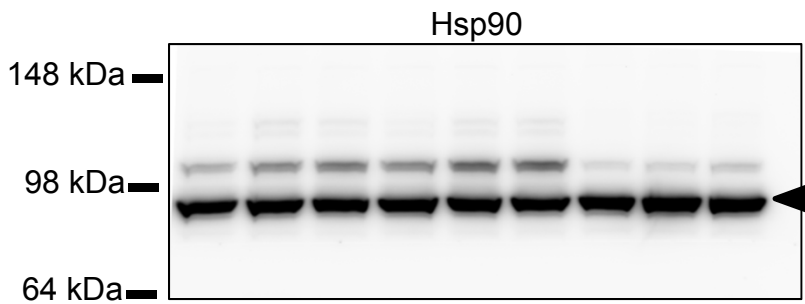

Full-length Western blot to Fig 4D

ADAR1 and MDA5

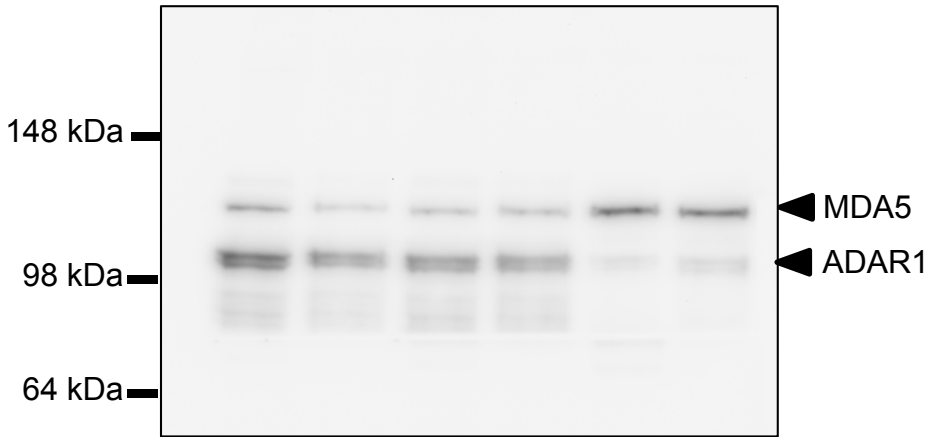

RIG-I

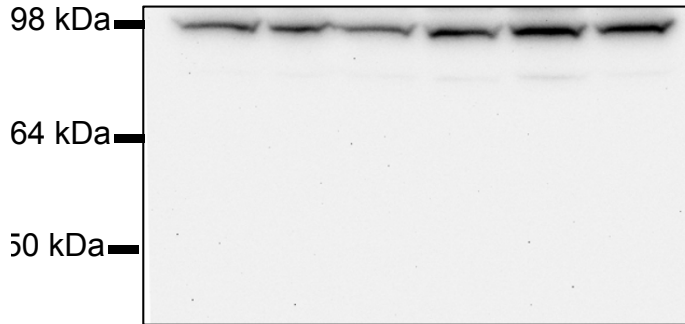

pSTAT1

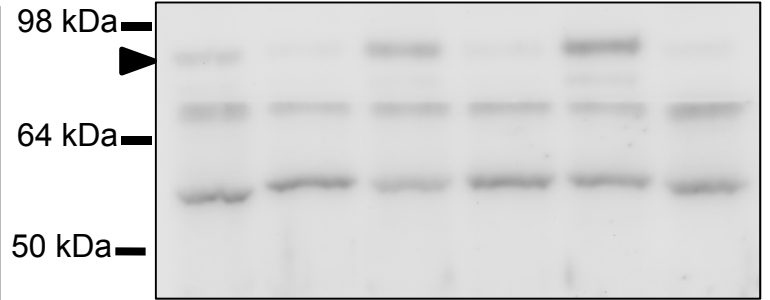

IRF7

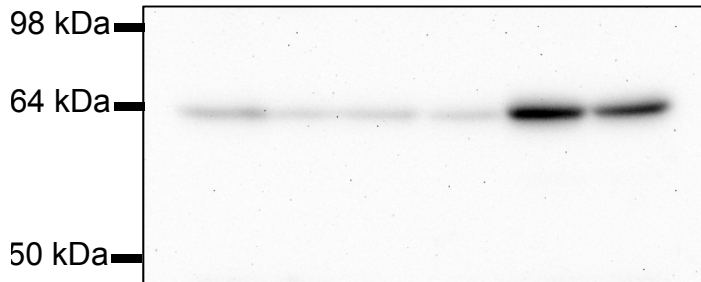

GAPDH

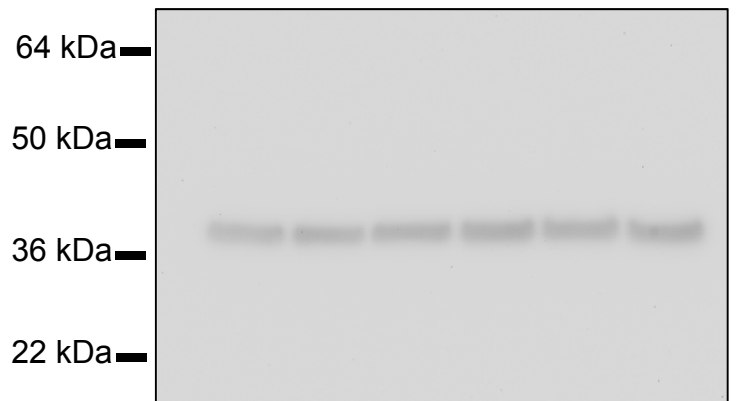

Full-length Western blot to Supplementary Fig 1D

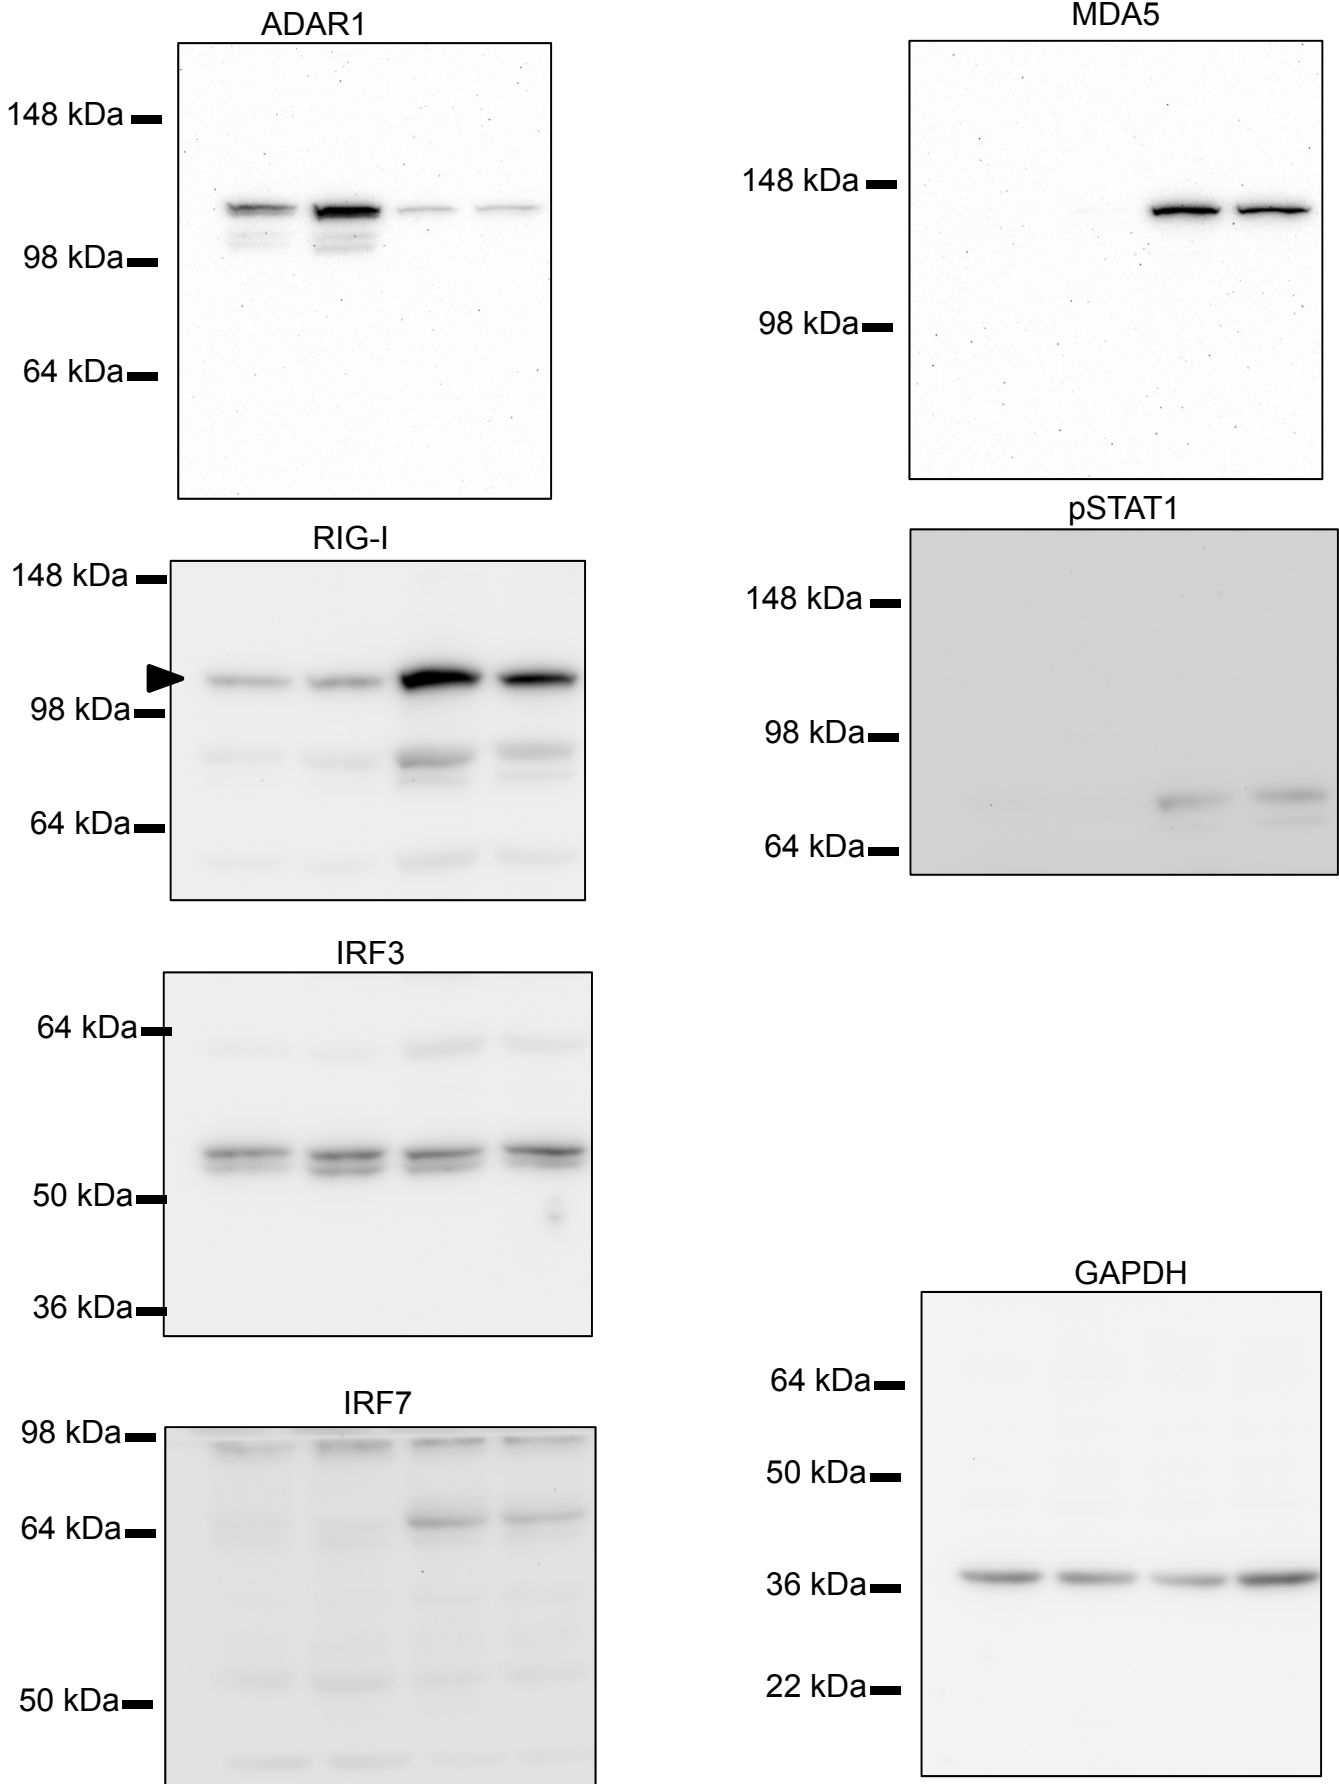

Full-length Western blot to Supplementary Fig 3A

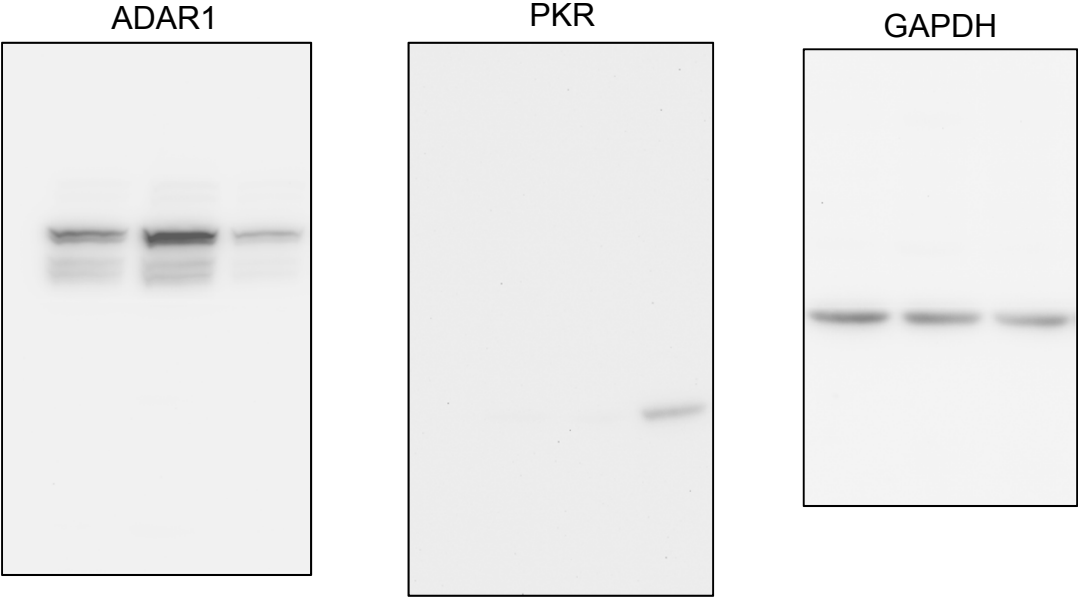

Full-length Western blot to Supplementary Fig 3C

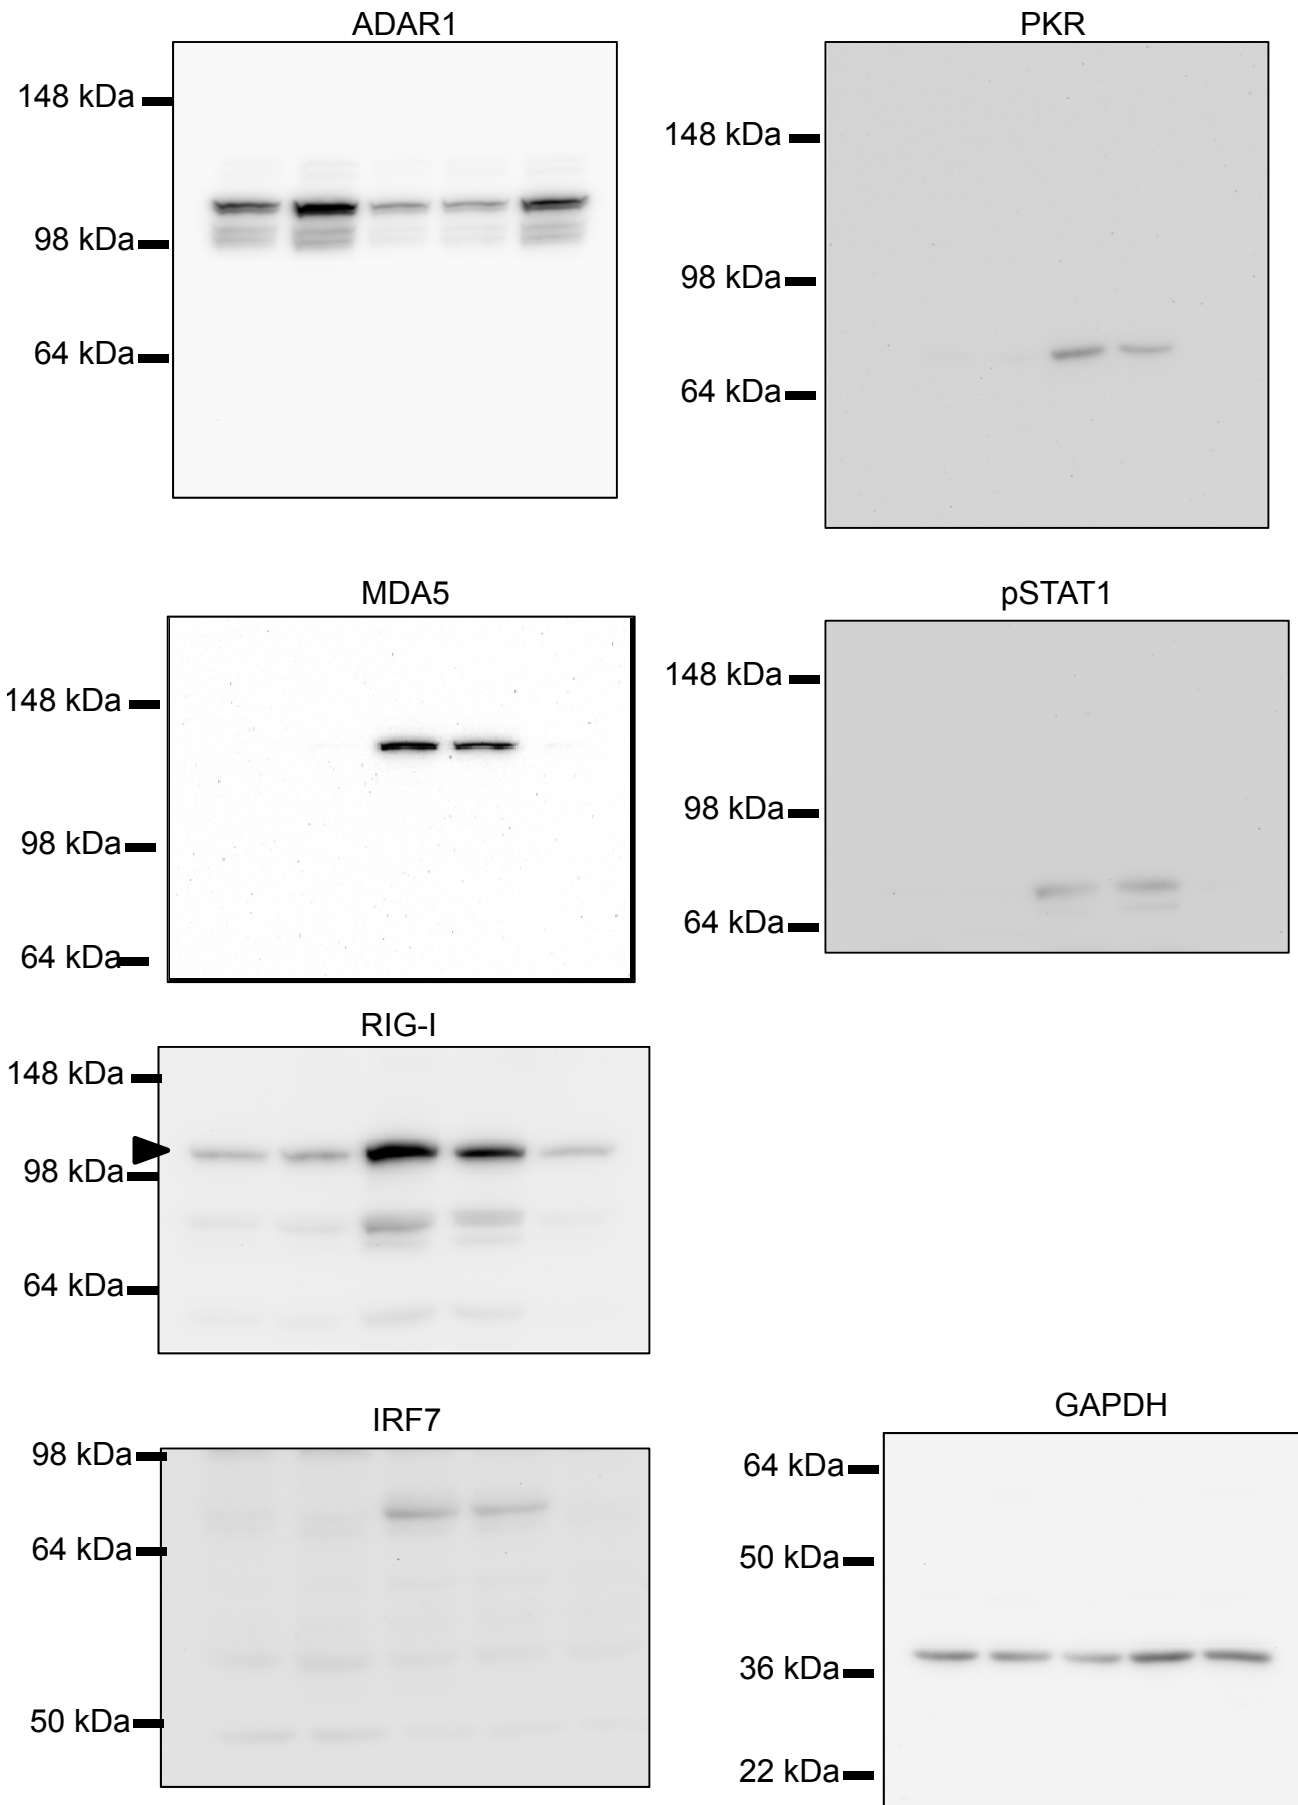

Full-length Western blot to Supplementary Fig 4C

ADAR1

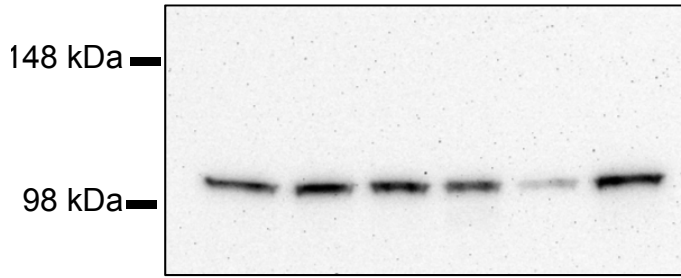

pSTAT1

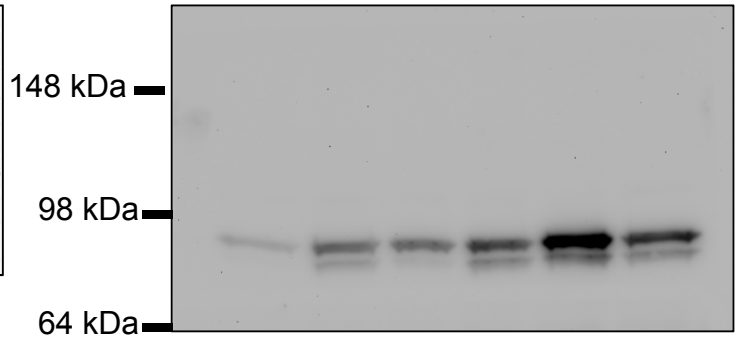

HIV-GAG

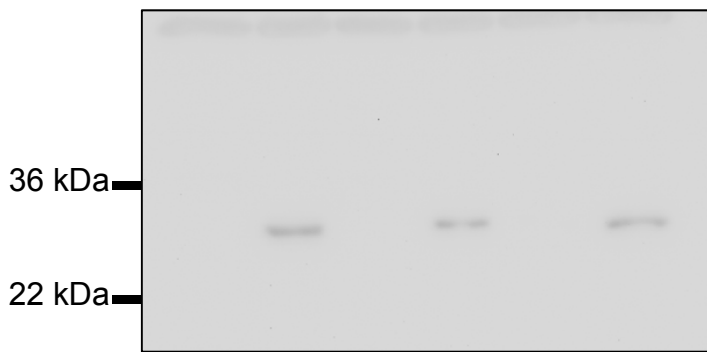

GAPDH

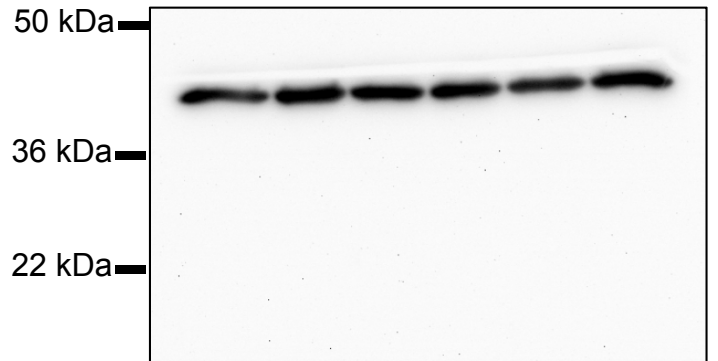

Full-length Western blot to Supplementary Fig 6

ADAR1

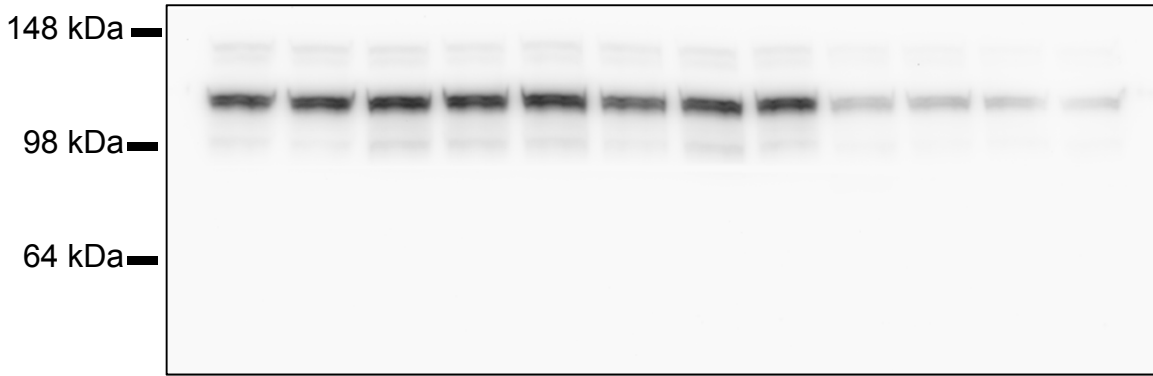

MDA5 and RIG-I

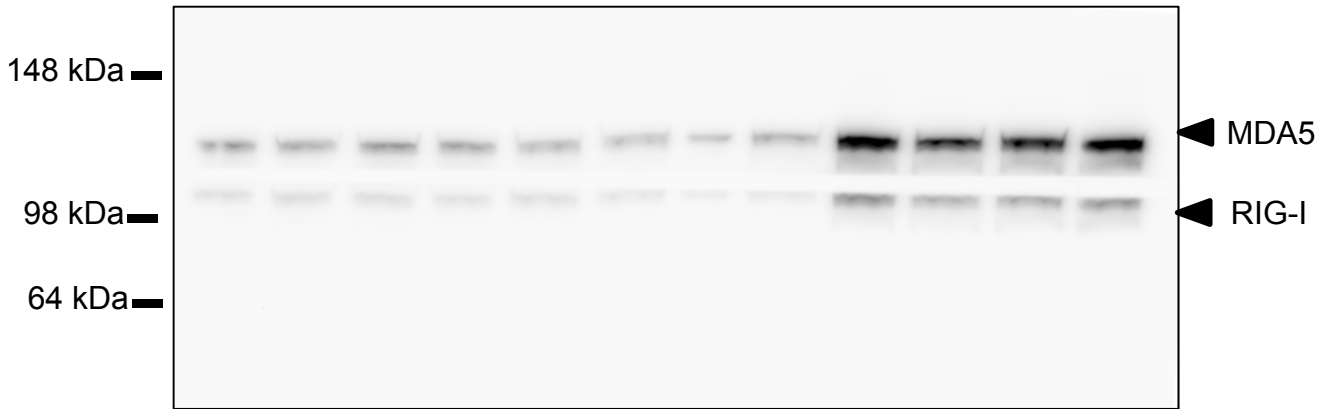

pSTAT1 and IRF7

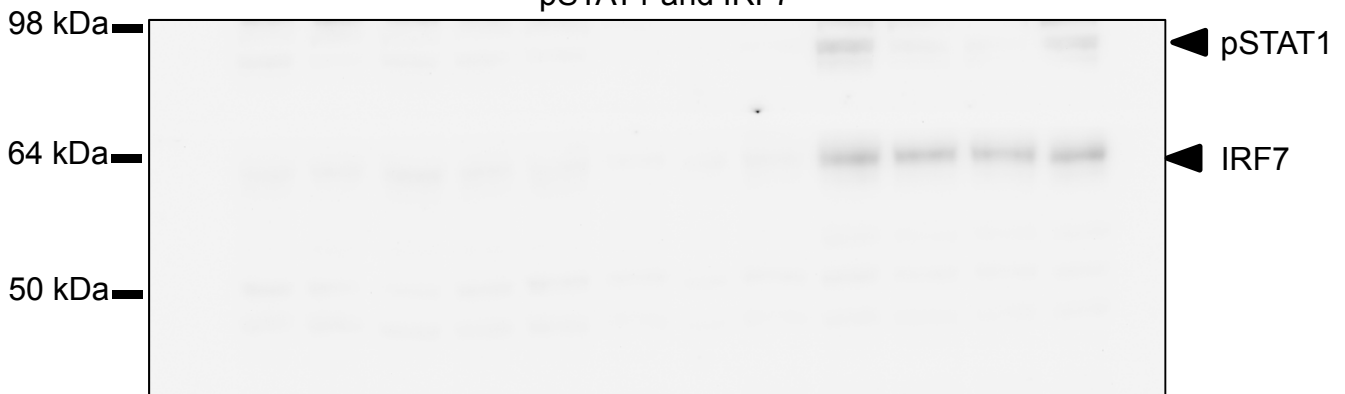

GAPDH

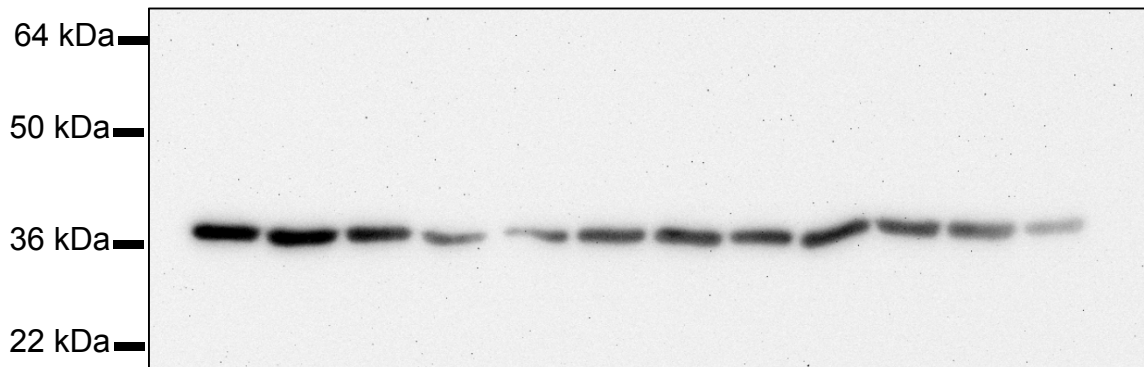

Supplement: 41598_2017_13580_MOESM1_ESM.pdf [file 41598_2017_13580_MOESM1_ESM.pdf]
